# Supplementary material for: Synthesis and mesomorphic properties of 1,1-difluoroalkyl-substituted biphenylthienyl and terphenyl liquid crystals. A comparative study of mesomorphic behavior relative to alkyl, alkoxy and alkanoyl analogsElectronic supplementary information (ESI) available: experimental details for compounds 4, 9, 10, 12, 15–19, 25–39, 45 and 49. See http://www.rsc.org/suppdata/jm/b1/b102059p/
Source: Royal Society of Chemistry journal article supplement (doi:10.1039/b102059p), 2001-10-31
Supplement: b102059p.doc [file b102059p.doc]

# **Supporting Information**

Synthesis and mesomorphic properties of 1,1-difluoroalkyl-substituted biphenylthienyl and terphenyl liquid crystals. A comparative study of mesomorphic behavior relative to alkyl, alkoxy and alkanoyl analogs (Andre A. Kiryanov, Paul Sampson and Alexander J. Seed*)

**1-Bromo-4-(1,1-difluoropentyl)benzene** (**4**)

Compound **4** was prepared as described for the preparation of -difluoroalkyl)thiophene **3** using the quantities stated: nitrosonium tetrafluoroborate(1.27 g, 10.9 mmol), anhydrous dichloromethane (22 mL), pyridinium polyhydrogen fluoride (4.5 mL, 70% HF content), dithiolane **2** (1.43 g, 4.51 mmol) in anhydrous dichloromethane (9 mL). The title compound **4** was obtained as a colorless liquid (0.860 g, 72%). 1H NMR ** 0.88 (t, *J=*7.1 Hz, 3H), 1.25-1.42 (m, 4H), 2.09 (m, 2H), 7.33 (d, *J=*8.7 Hz, 2H), 7.55 (d, *J=*8.6 Hz, 2H); 13C NMR ** 13.7, 22.2, 24.4 (t, *J*C-F=3.5 Hz), 38.6 (t, *J*C-F=28.0 Hz), 122.7 (t, *J*C-F=242.5 Hz), 126.7 (t, *J*C-F=6.2 Hz), 123.8, 131.5, 136.5 (t, *J*C-F=27.3 Hz); 19F NMR ** –96.0 (t, *J*F-H = 16.0 Hz).

**1-Bromo-4-dodecyloxybenzene** (**9**)

Compound **9** was prepared as described for the preparation of bromobiphenyl **6** using the quantities stated: 4-bromophenol (115.0 g, 0.6647 mol), 1-bromododecane (248.5 g, 0.9971 mol), potassium carbonate (275.6 g, 1.994 mol). The crude product was crystallized from petroleum fraction (bp 40-60 °C) and dried *in vacuo* (CaCl2, 4 h) to afford the title compound **9** as colorless crystals (175.00 g, 77%, purity (GC) >97%). 1H NMR (CDCl3)  0.88(3H, t), 1.26(16H, m), 1.43(2H, m), 1.75(2H, quint), 3.90(2H, t), 6.76(2H, d), 7.35(2H, d); IR (KBr) max 820, 1000, 1070, 1170, 1240, 1280, 1460, 1485, 1590, 2850, 2920 cm-1; MS *M/Z* 342,340(M+), 174,172(100%), 57,55.

**4-Dodecyloxyphenylboronic acid** (**10**)

Compound **10** was prepared as described for the preparation of biphenylboronic acid **7** using the quantities stated: bromobenzene **9** (20.1 g, 0.059 mol), n-butyllithium (7.1 mL, 10M in hexanes, 0.071 mol), THF (420 mL), pentane (200 mL), trimethyl borate (9.32 mL, 0.082 mol). The title compound **10** was obtained as a white solid (15.38 g, 85%) and was used directly in the next step. 1H NMR (DMSO-*d*6) ** 0.85 (t, *J=*6.5 Hz, 3H), 1.20-1.47 (m, 18H), 1.69 (quint, *J=*6.6 Hz, 2H), 3.92 (t, *J=*6.6 Hz, 2H), 6.85 (d, *J=*8.4 Hz, 2H), 7.74 (d, *J=*8.4 Hz, 2H), 7.80 (s, 2H).

**4’-Dodecyloxy-2-fluorobiphenyl-4-ylboronic acid** (**12**)

Compound **12** was prepared as described for the preparation of biphenylboronic acid **7** using the quantities stated: bromobiphenyl **11** (2.67 g, 6.13 mmol), n-butyllithium (0.74 mL, 10M in hexanes, 7.40 mmol), THF (200 mL), pentane (100 mL), trimethyl borate (0.96 mL, 8.5 mmol). The title compound **12** was obtained as a white solid (2.21g, 90%) which was used in the next step without further purification. 1H NMR (DMSO-*d*6) ** 0.85 (t, *J=*6.2 Hz, 3H), 1.20-1.47 (m, 18H), 1.72 (quint, *J=*6.9 Hz, 2H), 3.99 (t, *J=*6.6 Hz, 2H), 7.01 (d, *J=*8.1 Hz, 2H), 7.45 (d, *J=*7.8 Hz, 1H), 7.50 (d, *J=*7.8 Hz, 2H), 7.61 (d, *J=*12.0 Hz, 1H), 7.67 (d, *J=*7.5 Hz, 1H), 8.25 (s, 2H); 19F NMR (282 Hz) ** -84.9 (dd, *J*H-F=8.0, 11.8 Hz).

**4-Tridecylphenylboronic acid** (**15**)

Compound **15** was prepared as described for the preparation of biphenylboronic acid **7** using the quantities stated: bromobenzene **14** (15.0 g, 44.0 mmol), n-butyllithium (5.0 mL, 10M in hexanes, 50 mmol), THF (420 mL), pentane (400 mL), trimethyl borate (8.0 mL, 70 mmol). The title compound **15** was obtained as a white solid (13.3 g, 99%) and was used directly in the next step. 1H NMR (DMSO-*d*6) ** 0.86 (t, *J=*6.9 Hz, 3H), 1.24-1.40 (m, 20H), 1.56 (quint, *J=*7.5 Hz, 2H), 2.56 (t, *J=*7.8 Hz, 2H), 7.11 (d, *J=*7.5 Hz, 2H), 7.70 (d, *J=*7.5 Hz, 2H), 7.83 (s, 2H).

**4-Bromo-4'-tridecylbiphenyl** (**16**)

Compound **16** was prepared as described for the preparation of bromobiphenyl **11** except that the reaction mixture was heated under reflux for 20 h using the quantities stated: 1-bromo-4-iodobenzene (2.56 g, 9.05 mmol), tetrakis(triphenylphosphine)palladium(0) (0.70 g, 0.61 mmol), sodium carbonate (18 mL, 2.0M, 36 mmol), benzene (18 mL), phenylboronic acid **15** (3.38 g, 11.1 mmol) and ethanol (15 mL). The crude product was purified by silica gel column chromatography (petroleum ether) to afford the title compound **16** as a white solid (3.01 g, 80%). 1H NMR ** 0.88 (t, *J=*6.3 Hz, 3H), 1.27-1.46 (m, 20H), 1.63 (quint, *J=*7.5 Hz, 2H), 2.63 (t, *J=*7.5 Hz, 2H), 7.25 (d, *J=*8.1 Hz, 2H), 7.44 (d, *J=*8.1 Hz, 2H), 7.46 (d, *J=*8.1 Hz, 2H), 7.54 (d, *J=*8.4 Hz, 2H).

**4-Bromo-2-fluoro-4'-tridecylbiphenyl** (**17**)

Compound **17** was prepared as described for the preparation of bromobiphenyl **11** except that the reaction mixture was heated under reflux for 30 h using the quantities stated: 4-bromo-2-fluoro-1-iodobenzene (0.903 g, 3.00 mmol), tetrakis(triphenylphosphine)palladium(0) (0.173 g, 0.150 mmol), sodium carbonate (3.0 mL, 2.0M, 6.0 mmol), benzene (6.0 mL), phenylboronic acid **15** (1.14 g, 3.75 mmol) and ethanol (3.0 mL). The crude product was purified by column chromatography on silica gel (hexanes - ethyl acetate 20:1) to afford a clear liquid which crystallized overnight to afford the title compound **17** as a white solid (1.17 g, 90%). 1H NMR ** 0.88 (t, *J=*6.6 Hz, 3H), 1.24-1.40 (m, 20H), 1.66 (quint, *J=*7.2 Hz, 2H), 2.68 (t, *J=*7.7 Hz, 2H), 7.29 (d, *J=*7.9 Hz, 2H), 7.32-7.39 (m, 3H), 7.45 (d, *J=*8.2 Hz, 1H), 7.46 (d, *J*=7.7 Hz, 1H). 13C NMR (75 MHz) ** 14.3, 22.9, 29.6, 29.8 (2), 29.9, 31.6, 32.2, 35.9, 119.9 (d, *J*C-F=26.3 Hz), 121.1 (d, *J*C-F=9.5 Hz), 127.8 (d, *J*C-F=3.5 Hz), 128.4 (d, *J*C-F=13.3 Hz), 128.8, 128.9, 131.8 (d, *J*C-F=4.0 Hz), 132.2, 143.2, 159.7 (d, *J*C-F=252.2 Hz).

**4’-Tridecylbiphenyl-4-ylboronic acid** (**18**)

Compound **18** was prepared as described for the preparation of biphenylboronic acid **7** using the quantities stated: bromobiphenyl **16** (3.01 g, 7.25 mmol), n-butyllithium (1.2 mL, 10M in hexanes, 12 mmol,), THF (240 mL), pentane (100 mL), trimethyl borate (1.6 mL, 14 mmol). The title compound **18** was obtained as a white solid (2.22 g, 81%). 1H NMR (DMSO-*d*6) ** 0.85 (t, *J=*6.3 Hz, 3H), 1.20-1.34 (m, 20H), 1.57 (quint, *J=*7.5 Hz, 2H), 2.60 (t, *J=*7.5 Hz, 2H), 7.27 (d, *J=*7.8 Hz, 2H), 7.59 (d, *J=*6.9 Hz, 2H), 7.61 (d, *J=*6.9 Hz, 2H), 7.87 (d, *J=*7.2 Hz, 2H), 8.06 (s, 2H).

**2-Fluoro-4’-tridecylbiphenyl-4-ylboronic acid** (**19**)

Compound **19** was prepared as described for the preparation of biphenylboronic acid **7** using the quantities stated: bromobiphenyl **17** (2.90 g, 6.70 mmol), n-butyllithium (0.9 mL, 10M in hexanes, 9.0 mmol), THF (300 mL), trimethyl borate (1.4 mL, 1.2 mmol). The title compound **19** was obtained as a white solid (2.23 g, 84%). 1H NMR (DMSO-*d*6) ** 0.85 (t, *J=*6.2 Hz, 3H), 1.20-1.35 (20H, m), 1.58 (quint, *J=*7.5 Hz, 2H), 2.61 (t, *J*=7.5 Hz, 2H), 7.28 (d, *J=*7.5 Hz, 2H), 7.46-7.51 (m, 3H), 7.62 (d, *J*=12 Hz, 1H), 7.68 (d, *J*=7.5 Hz, 1H), 8.25 (s, 2H); 19F NMR ** –116.0 (m, 1F).

**2-(4’-Dodecyloxy-2-fluorobiphenyl-4-yl)-5-(1,1-difluoropentyl)thiophene** (**25**)

Compound **25** was prepared as described for the preparation of compound **11** except that the reaction mixture was heated under reflux for 3.5 h using the quantities stated: bromothiophene **3** (0.150 g, 0.558 mmol), tetrakis(triphenylphosphine)palladium(0) (0.025 g, 0.022 mmol), sodium carbonate (0.6 mL, 2.0M, 1.2 mmol), benzene (1.4 mL), biphenylboronic acid **12** (0.308 g, 0.770 mmol) and ethanol (0.6 mL). The residue was passed through a silica plug (7 cm long, 6cm in diameter) using vacuum suction. The silica plug was quickly washed with petroleum ether-dichloromethane (4:1) (200 mL). The organic solution was concentrated *in vacuo* and the residue was dried *in vacuo* (P2O5, paraffin wax, 1.1 mm Hg) to afford the title compound **25** as a white solid (0.237g, 78% yield). Transitions (ºC) Cryst 70.9 SA 109.9 Iso Liq; 1H NMR ** 0.89 (t, *J*=6.9 Hz, 3H), 0.94 (t, *J*=7.2 Hz, 3H), 1.24-1.55 (m, 22H), 1.82 (quint, *J*=7.0 Hz, 2H), 2.25 (m, 2H), 4.01 (t, *J*=6.6 Hz, 2H), 6.98 (d, *J*=8.8 Hz, 2H), 7.18 (dt, *J*=3.8, 1.3 Hz, 1H), 7.23 (dt, *J*=3.8, 1.2 Hz, 1H), 7.34-7.47 (m, 3H), 7.51 (d, *J*=8.7, 1.5 Hz, 2H); 13C NMR ** 14.0, 14.3, 22.5, 22.9, 24.9, 26.2, 29.4, 29.5, 29.6, 29.8, 32.1, 38.8 (t, *J*C-F=26.7 Hz), 68.3, 113.6 (d, *J*C-F=24.8 Hz), 114.7, 121.3 (t, *J*C-F=239.7 Hz), 122.0 (d, *J*C-F=2.8 Hz), 123.3, 127.1 (t, *J*C-F=5.7 Hz), 127.4, 128.5 (d, *J*C-F=13.4 Hz), 130.1 (d, *J*C-F=3.2 Hz), 131.0 (d, *J*C-F=3.8 Hz), 134.1 (d, *J*C-F=8.3 Hz), 139.2 (t, *J*C-F=31.8 Hz), 158.2, 159.9 (d, *J*C-F=247.3 Hz); 19F NMR ** -85.0 (t, *J*F-H=16.0 Hz, 2F), -117.9 (dd, *J*F-H = 11.0 Hz, 7.0 Hz, 1F); Anal. Calcd for C33H43F3OS: C, 72.76; H, 7.96; S, 5.89; found C, 72.94; H, 7.70; S, 6.26.

**2-(1,1-Difluoropentyl)-5-(4’-Tridecylbiphenyl-4-yl)thiophene** (**26**)

Compound **26** was prepared as described for the preparation of bromobiphenyl **11** using the quantities stated: bromothiophene **3** (0.186 g, 0.690 mmol), tetrakis(triphenylphosphine)palladium(0) (0.034 g, 0.029 mmol), sodium carbonate (0.75 mL, 2.0M, 1.5 mmol), benzene (1.5 mL), biphenylboronic acid **18** (0.301 g, 0.790 mmol) and ethanol (0.8 mL). The crude product was crystallized from pentane-ethanol-ethyl acetate (1:1:2) to afford the title compound **26** (0.22g, 59%). Transitions (ºC) Cryst 141.6 SA 151.9 Iso Liq; 1H NMR ** 0.89 (t, *J=*6.8 Hz, 3H), 0.94 (t, *J=*7.3 Hz, 3H), 1.24-1.55 (m, 24H), 1.66 (quint, *J=*7.1 Hz, 2H), 2.26 (m, 2H), 2.65 (t, *J*=7.7 Hz, 2H), 7.18 (d, *J=*3.7 Hz, 1H), 7.24 (d, *J=*3.8 Hz, 1H), 7.27 (d, *J=*8.0 Hz, 2H), 7.54 (d *J=*8.1 Hz, 2H), 7.61 (d, *J=*8.3 Hz, 2H), 7.66 (d, *J=*8.6 Hz, 2H); 13C NMR ** 14.0, 14.3, 22.5, 22.9, 24.9, 29.5, 29.7, 29.8 (2), 31.7, 32.1, 35.8, 38.8 (t, *J*C-F=26.8 Hz), 121.4 (t, *J*C-F=239.7 Hz), 122.7, 126.5, 126.9, 127.0 (t, *J*C-F=5.7 Hz), 127.6, 129.1, 132.5, 137.7, 138.5 (t, *J*C-F=31.8 Hz), 141.0, 142.7, 145.9; 19F NMR ** -84.9 (t, *J*F-H=16.0 Hz); Anal. Calcd for C34H46F2S: C, 77.81; H, 8.83; found C, 77.81; H, 8.50.

2-(1,1-Difluoropentyl)-5-(2-fluoro-4’-tridecylbiphenyl-4-yl)thiophene (27)

Compound **27** was prepared as described for the preparation of bromobiphenyl **11** except that the reaction mixture was heated under reflux for 3.5 h using the quantities stated: bromothiophene **3** (0.150 g, 0.558 mmol), tetrakis(triphenylphosphine)palladium(0) (0.025 g, 0.022 mmol), sodium carbonate (0.6 mL, 2.0M, 1.2 mmol), benzene (1.2 mL), biphenylboronic acid **19** (0.301 g, 0.756 mmol) and ethanol (0.6 mL). The residue was passed through a silica plug (7 cm long, 6cm in diameter) using vacuum suction. The silica plug was quickly washed with petroleum ether-dichloromethane (4:1) (200 mL). The organic solution was concentrated *in vacuo* and the residue was dried *in vacuo* (P2O5, paraffin wax, 1.1 mm Hg) to afford the title compound **27** (0.263 g, 87%). Transitions (ºC) Cryst 50.9 SA 87.2 Iso Liq; 1H NMR  0.88 (t, *J=*6.8 Hz, 3H), 0.93 (t, *J=*7.2 Hz, 3H), 1.24-1.57 (m, 24H), 1.65 (quint, *J=*7.2 Hz, 2H), 2.24 (m, 2H), 2.65 (t, *J*=7.8 Hz, 2H), 7.18 (d, *J=*3.6 Hz, 1H), 7.23 (d, *J=*3.9 Hz, 1H), 7.27 (d, *J=*8.4 Hz, 2H), 7.31-7.47 (m, 3H), 7.49 (d, *J=*8.1, 1.5 Hz, 2H); 13C NMR ** 14.0, 14.3, 22.5, 22.9, 24.9, 29.5, 29.7, 29.8 (2), 31.6, 32.1, 35.9, 38.8 (t, *J*C-F=26.8 Hz), 113.6 (d, *J*C-F=24.9 Hz), 121.3 (t, *J*C-F=239.1 Hz), 122.0 (d, *J*C-F=2.7 Hz), 122.8 (d, *J*C-F=3.0 Hz), 123.4, 127.1 (t, *J*C-F=5.6 Hz), 128.8, 128.9 (d, *J*C-F=2.8 Hz), 132.6 (d, *J*C-F=16.0 Hz), 134.4 (d, *J*C-F=7.7 Hz), 139.3 (t, *J*C-F=32.5 Hz), 143.1, 144.5, 160.1; 19F NMR ** -85.0 (t, *J*F-H=16.0 Hz, 2F), -117.7 (dd, *J*F-H = 11.0 Hz, 7.0 Hz, 1F); Anal. Calcd for C34H45F3S: C, 75.24; H, 8.36; S, 5.91; found C, 75.18; H, 8.51; S, 6.02.

**2-(4’-Dodecyloxybiphenyl-4-yl)-5-pentylthiophene** (**28**)

Compound **28** was prepared as described for the preparation of bromobiphenyl **11** except that the reaction mixture was heated under reflux for 5 h using the quantities stated: bromothiophene **20** (0.350 g, 1.50 mmol), tetrakis(triphenylphosphine)palladium(0) (0.087 g, 0.075 mmol), sodium carbonate (1.5 mL, 2.0M, 3.0 mmol), benzene (5 mL), biphenylboronic acid **7** (0.764 g, 2.00 mmol) and ethanol (3 mL). The residue was passed through a short silica plug (5 cm long, 4 cm in diameter). Concentration *in vacuo* afforded a yellow solid. The crude product was subjected to column chromatography on silica gel (petroleum ether – dichloromethane 20:1) and dried under vacuum (P2O5, paraffin wax, 1.1 mm Hg) to provide the title compound **28** as a white solid (0.71 g, 97%). Transitions (ºC) Cryst 92.3 SA 178.7 Iso Liq; 1H NMR ** 0.88 (t, *J=*6.9 Hz, 3H), 0.92 (t, *J*=6.9 Hz, 3H), 1.20-1.52 (m, 22H), 1.71 (quint, *J=*7.4 Hz, 2H), 1.83 (quint, *J=*7.1 Hz, 2H), 2.82 (t, *J=*7.6 Hz, 2H), 4.00 (t, *J=*6.6 Hz, 2H), 6.75 (d, *J=*3.6 Hz, 1H), 6.97 (d, *J*=8.7, 2H), 7.14 (d, *J=*3.5 Hz, 1H), 7.52-7.55 (m, 4H), 7.60 (d, *J=*8.4 Hz, 2H); 13C NMR ** 14.2, 14.3, 22.6, 22.9, 26.2, 29.4, 29.5, 29.6, 29.7, 30.4, 31.5 (2), 32.1, 68.3, 115.0, 122.7, 125.2, 125.9, 127.1, 128.0, 133.1, 133.3, 139.5, 141.5, 145.8, 158.9; Anal. Calcd for C33H46OS: C, 80.76; H, 9.45; S, 6.53; found C, 80.79; H, 9.35; S, 6.22.

**2-(4’-Dodecyloxy-2-fluorobiphenyl-4-yl)-5-pentylthiophene** (**29**)

Compound **29** was prepared as described for the preparation of bromobiphenyl **11** except that the reaction mixture was heated under reflux for 3 h using the quantities stated: bromothiophene **20** (0.176 g, 0.755 mmol), tetrakis(triphenylphosphine)palladium(0) (0.028 g, 0.025 mmol), sodium carbonate (0.5 mL, 2.0M, 1.0 mmol), benzene (1.0 mL), biphenylboronic acid **12** (0.241 g, 0.603 mmol) and ethanol (1.5 mL). The crude product was subjected to column chromatography on silica gel (petroleum ether - dichloromethane 20:1) and dried under reduced pressure (P2O5, paraffin wax, 48 h, 1.1 mm Hg) to afford the title compound **29** as a white solid (0.260 g, 85%). Transitions (ºC) Cryst 78.8 SA 98.0 N 115.0 Iso Liq; 1H NMR ** 0.88 (t, *J*=7.0 Hz, 3H), 0.92 (t, *J*=6.9 Hz, 3H), 1.20-1.50 (m, 22H), 1.71 (quint, *J*=7.5 Hz, 2H), 1.81 (quint, *J*=7.4 Hz, 2H), 2.82 (t, *J*=7.6 Hz, 2H), 4.00 (t, *J*=6.6 Hz, 2H), 6.76 (d, *J*=3.7 Hz, 1H), 6.97 (d, *J*=8.9 Hz, 2H), 7.15 (d, *J*=3.6 Hz, 1H), 7.30-7.40 (m, 3H), 7.50 (dd, *J*=8.8, 1.5 Hz, 2H); 13C NMR ** 14.2, 14.3, 22.6, 22.9, 26.2, 29.4, 29.5, 29.6, 29.8, 30.4, 31.4, 32.1, 68.2, 112.9 (d, *J*C-F=24.6 Hz), 114.7, 121.4 (d, *J*C-F=2.9 Hz), 123.4, 125.3, 127.1 (d, *J*C-F=13.6 Hz), 127.8, 130.1 (d, *J*C-F=4.2 Hz), 135.3 (d, *J*C-F=8.7 Hz), 140.2, 146.6, 159.0, 160.1 (d, *J*C-F=246.9 Hz); 19F NMR ** -118.6 (dd, *J*F-H = 12.0, 6.0 Hz); Anal. Calcd for C33H45FOS: C, 77.90; H, 8.92; S, 6.30; found C, 77.87; H, 8.78; S, 6.45.

**2-Pentanoyl-5-(4'-tridecylbiphenyl-4-yl)thiophene** (**30**)

Compound **30** was prepared as described for the preparation of bromobiphenyl **11** except that the reaction mixture was heated under reflux for 3.5 h using the quantities stated: bromothiophene **21** (0.371 g, 1.50 mmol), tetrakis(triphenylphosphine)palladium(0) (0.085 g, 0.075 mmol), sodium carbonate (1.5 mL, 2.0M, 3.0 mmol), benzene (3.0 mL), biphenylboronic acid **18** (0.656 g, 1.73 mmol) and ethanol (1.5 mL). The product was purified by gradient column chromatography on silica gel (petroleum ether – dichloromethane (10:1 – 1:1) and dried *in vacuo* (P2O5, paraffin wax, 1.1 mm Hg) to afford the title compound **30** as a white solid (0.46 g, 61%). Transitions (ºC) Cryst 150.5 SF 180.2 SA 219.6 Iso Liq; 1H NMR  0.89 (t, *J=*6.7 Hz, 3H), 0.97 (t, *J=*7.3 Hz, 3H), 1.25-1.37 (m, 20H), 1.44 (sext, *J*=7.4 Hz, 2H), 1.66 (quint, *J=*7.3 Hz, 2H), 1.76 (quint, *J=*7.5 Hz, 2H), 2.66 (t, *J=*7.7 Hz, 2H), 2.90 (t, *J=*7.5 Hz, 2H), 7.27 (d, *J*=8.2 Hz, 2H), 7.35 (d, *J=*3.9 Hz, 1H), 7.54 (d, *J=*8.2 Hz, 2H), 7.64 (d, *J*=8.5 Hz, 2H), 7.69 (d, *J=*4.0 Hz, 1H), 7.77 (d, *J=*8.5 Hz, 2H); 13C NMR  14.1, 14.3, 22.7, 22.9, 27.2, 29.5, 29.7, 29.8 (2), 31.6, 32.1, 35.8, 39.0, 123.9, 126.8, 126.9, 127.7, 129.1, 132.2, 132.9, 137.6, 141.9, 142.9, 143.1, 152.2, 193.6; Anal. Calcd for C34H46OS: C, 81.22; H, 9.22; S, 6.38; found C, 81.56; H, 9.11; S, 6.67.

**2-(2-Fluoro-4’-tridecylbiphenyl-4-yl)-5-pentanoylthiophene** (**31**)

Compound **31** was prepared as described for the preparation of compound **11** except that the reaction mixture was heated under reflux for 3.5 h using the quantities stated: bromothiophene **21** (0.371 g, 1.50 mmol), tetrakis(triphenylphosphine)palladium(0) (0.085 g, 0.075 mmol), sodium carbonate (1.5 mL, 2.0M, 3.0 mmol), benzene (3.0 mL), biphenylboronic acid **19** (0.689 g, 1.73 mmol) and ethanol (1.5 mL). The product was purified by column chromatography on silica gel (petroleum ether – dichloromethane 1:1) and dried *in vacuo* (P2O5, paraffin wax, 1.1 mm Hg) to afford the title compound **31** as a white solid (0.730 g, 94%). Transitions (ºC) Cryst 85.0 SA 167.6 Iso Liq; 1H NMR ** 0.89 (t, *J=*6.7 Hz, 3H), 0.97 (t, *J=*7.3 Hz, 3H), 1.24-1.36 (m, 20H), 1.40 (sext, *J*=7.4 Hz, 2H), 1.66 (quint, *J=*7.4 Hz, 2H), 1.76 (quint, *J=*7.5 Hz, 2H), 2.66 (t, *J=*7.7 Hz, 2H), 2.90 (t, *J=*7.5 Hz, 2H), 7.28 (d, *J*=8.3 Hz, 2H), 7.34 (d, *J=*4.0 Hz, 1H), 7.40-7.52 (m, 5H), 7.68 (d, *J=*4.0 Hz, 1H); 13C NMR (125 MHz) ** 14.1, 14.3, 22.7, 22.9, 27.2, 29.6 (2), 29.7, 29.8, 29.9 (2), 31.6, 32.1, 35.9, 39.1, 114.0 (d, *J*C-F=24.6 Hz), 122.3 (d, *J*C-F=3.1 Hz), 124.5, 128.8, 128.9 (d, *J*C-F=3.0 Hz), 129.7 (d, *J*C-F=13.3 Hz), 131.4 (d, *J*C-F=4.1 Hz), 132.5, 132.7, 134.2 (d, *J*C-F=8.3 Hz), 143.3, 143.8, 150.6, 160.2 (d, *J*C-F=248.4 Hz), 193.4; 19F NMR (282 Hz) ** -117.3 (m); Anal. Calcd for C34H45FOS: C, 78.41; H, 8.71; S, 6.16; found C, 78.70; H, 8.53; S, 6.50.

**4-Dodecyloxy-4''-(1,1-difluoropentyl)-1,1':4',1''-terphenyl** (**32**)

Compound **32** was prepared as described for the preparation of compound **11** except that the reaction mixture was heated under reflux for 3 h using the quantities stated: bromobenzene **4** (0.350 g, 1.33 mmol), tetrakis(triphenylphosphine)palladium(0) (0.085 g, 0.074 mmol), sodium carbonate (1.5 ml, 2.0M, 3.0 mmol), benzene (3.0 mL), biphenylboronic acid **7** (0.580 g, 1.52 mmol) and ethanol (1.5 mL). The crude product was subjected to column chromatography on silica gel (pentane – dichloromethane 4:1). The resulting solid was washed with a large amount of pentane and dried *in vacuo* (P2O5, paraffin wax, 1.2 mm Hg) to afford the title compound **32** as a white solid (0.602 g, 90%). Transitions (ºC) Cryst 104.5 SX 190.1 SB 193.5 SA 197.2 Iso Liq; 1H NMR ** 0.89 (t, *J=*6.9 Hz, 3H), 0.91 (t, *J=*8.1 Hz, 3H), 1.24-1.55 (m, 22H), 1.82 (quint, *J=*7.0 Hz, 2H), 2.17 (m, 2H), 4.02 (t, *J*=6.6 Hz, 2H), 6.99 (d, *J=*8.8 Hz, 2H), 7.55 (d, *J*=8.4 Hz, 2H), 7.57 (d, *J=*8.6 Hz, 2H), 7.65 (s, 4H), 7.68 (d, *J*=8.3 Hz, 2H); 13C NMR ** 13.7, 14.0, 22.3, 22.6, 24.5, 26.0, 29.2, 29.3 (2), 29.5, 31.8, 38.7 (t, *J*C-F=27.5 Hz), 68.0, 114.8, 123.1 (t, *J*C-F=241.6 Hz), 125.4 (t, *J*C-F=6.1 Hz), 126.8, 127.0, 127.4, 127.9, 132.4, 136.3 (t, *J*C-F=27.3 Hz), 138.3, 140.2, 141.9, 158.8; 19F NMR **–95.5 (t, *J*F-H = 16.0 Hz); Anal. Calcd for C35H46F2O: C, 80.73; H, 8.90; found C, 80.65; H, 8.83.

**4-Dodecyloxy-2'-fluoro-4''-(1,1-difluoropentyl)-1,1':4',1''-terphenyl** (**33**)

Compound **33** was prepared as described for the preparation of compound **11** except that the reaction mixture was heated under reflux for 3 h using the quantities stated: bromobenzene **4** (0.380 g, 1.44 mmol), tetrakis(triphenylphosphine)palladium(0) (0.085 g, 0.074 mmol), sodium carbonate (1.5 mL, 2.0M, 3.0 mmol), benzene (3.0 mL), biphenylboronic acid **12** (0.692 g, 1.73 mmol) and ethanol (1.5 mL). The residue was passed through a silica plug (7 cm long, 4 cm diameter) using vacuum suction and petroleum ether-dichloromethane (7:3) as eluent. Concentration *in vacuo* gave an off-white solid which was dissolved in pentane (100 mL), decanted to remove any insoluble impurities and the solution was cooled to 0C. The resulting crystals were dried *in vacuo* (P2O5, paraffin wax, 1.2 mm Hg) to afford the title compound **33** as a white solid (0.612 g, 79%). Transitions (ºC) Cryst 70.0 SB 89.3 SA 133.0 Iso Liq; 1H NMR  0.89 (t, *J=*6.9 Hz, 3H), 0.92 (t, *J=*7.0 Hz, 3H), 1.24-1.55 (m, 22H), 1.82 (quint, *J=*7.0 Hz, 2H), 2.17 (m, 2H), 4.02 (t, *J*=6.6 Hz, 2H), 7.00 (d, *J=*8.8 Hz, 2H), 7.36-7.57 (m, 7H), 7.66 (d, *J=*8.4 Hz, 2H); 13C NMR ** 13.7, 14.0, 22.3, 22.6, 24.5, 26.0, 29.2, 29.3 (2), 29.5, 31.8, 38.7 (t, *J*C-F=27.3 Hz), 68.0, 114.4, 114.5 (d, *J*C-F=23.8 Hz), 122.8 (d, *J*C-F=2.8 Hz), 123.0 (t, *J*C-F=242.0 Hz), 125.5 (t, *J*C-F=6.0 Hz), 126.8, 127.3, 127.9 (d, *J*C-F=13.4 Hz), 129.9 (d, *J*C-F=2.9 Hz), 130.7 (d, *J*C-F=3.9 Hz), 136.8 (t, *J*C-F=27.2 Hz), 140.5 (d, *J*C-F=8.0 Hz), 140.7, 158.9, 159.9 (d, *J*C-F=247.5 Hz); 19F NMR (282 MHz) ** -118.2 (ddt, *J*=12.0, 9.0, 1.5 Hz, 1F), -95.6 (t, *J*=16 Hz, 2F); Anal. Calcd for C35H45F3O: C, 78.03; H, 8.42; found C, 77.94; H, 8.21.

**4-(1,1-Difluoropentyl)-4''-tridecyl-1,1':4',1'’-terphenyl** (**34**)

Compound **34** was prepared as described for the preparation of compound **11** except that the reaction mixture was heated under reflux for 3 h using the quantities stated: bromobenzene **4** (0.380 g, 1.44 mmol), tetrakis(triphenylphosphine)palladium(0) (0.085 g, 0.074 mmol), sodium carbonate (1.5 mL, 2.0M, 3.0 mmol), benzene (3.0 mL), biphenylboronic acid **18** (0.692 g, 1.73 mmol) and ethanol (1.5 mL). The residue was passed through a silica plug (7 cm long, 4 cm diameter) using vacuum suction and petroleum ether-dichloromethane (7:3) as eluent. Concentration *in vacuo* gave an off-white solid which was dissolved in pentane (100 mL), decanted to remove any insoluble impurities and the solution was cooled to 0C. The resulting crystals were dried *in vacuo* (P2O5, paraffin wax, 1.2 mm Hg) to afford the title compound **34** as a white solid (0.362 g, 46%). Transitions (ºC) Cryst 101.6 SB 168.2 Iso Liq; 1H NMR ** 0.91 (t, *J*=6.8 Hz, 3H), 0.93 (t, *J*=7.1 Hz, 3H), 1.24-1.53 (m, 24H), 1.68 (quint, *J*=7.3 Hz, 2H), 2.19 (m, 2H), 2.68 (t, *J*=7.7 Hz, 2H), 7.30 (d, *J*=8.3 Hz, 2H), 7.57 (d, *J*=8.3 Hz, 2H), 7.58 (d, *J*=8.1 Hz, 2H), 7.69 (s, 4H), 7.70 (d, *J*=8.2 Hz, 2H); 13C NMR ** 13.7, 14.0, 22.3, 22.6, 24.5, 29.3, 29.4, 29.5, 29.6, 31.4, 31.8, 35.5, 38.7 (t, *J*C-F=31.3 Hz), 123.1 (t, *J*C-F=241.8 Hz), 125.4 (t, *J*C-F=6.0 Hz), 126.8 (2), 127.3, 127.4, 128.8, 136.3 (t, *J*C-F=26.9 Hz), 137.7, 138.7, 140.5, 141.9, 142.3; 19F NMR (282 MHz) ** -95.5 (t, *J*=16.5 Hz); Anal. Calcd for C36H48F2: C, 83.35; H, 9.33; found C, 83.24; H, 9.08.

**2'-Fluoro-4''-(1,1-difluoropentyl)-4-tridecyl-1,1':4',1''-terphenyl** (**35**)

Compound **35** was prepared as described for the preparation of compound **11** except that the reaction mixture was heated under reflux for 3 h using the quantities stated: bromobenzene **4** (0.385 g, 1.46 mmol), tetrakis(triphenylphosphine)palladium(0) (0.090 g, 0.079 mmol), sodium carbonate (1.5 mL, 2.0M, 3.0 mmol), benzene (3.0 mL), biphenylboronic acid **19** (0.689 g, 1.73 mmol) and ethanol (1.5 mL). The residue was passed through a silica plug (7 cm long, 4 cm diameter) using vacuum suction and petroleum ether-dichloromethane (7:3) as eluent. Concentration *in vacuo* gave an off-white solid which was dissolved in pentane (100 mL), decanted to remove any insoluble impurities and the solution was cooled to 0C. The resulting crystals were dried *in vacuo* (P2O5, paraffin wax, 1.2 mm Hg) to afford the title compound **35** as a white solid (0.474 g, 61%). Transitions (ºC) Cryst 71.8 SB 85.4 SA 100.1 Iso Liq; 1H NMR ** 0.88 (t, *J=*7.0 Hz, 3H), 0.90 (t, *J=*7.1 Hz, 3H), 1.24-1.55 (m, 24H), 1.66 (quint, *J=*7.4 Hz, 2H), 2.16 (m, 2H), 2.66 (t, *J*=7.7 Hz, 2H), 7.28 (d, *J=*8.1 Hz, 2H), 7.36-7.57 (m, 7H), 7.66 (d, *J=*8.1 Hz, 2H); 13C NMR ** 13.7, 14.0, 22.3, 22.6, 24.5, 29.3, 29.4, 29.5, 29.6, 31.4, 31.8, 35.6, 38.7 (t, *J*C-F=27.4 Hz), 114.6 (d, *J*C-F=24.1 Hz), 122.8 (d, *J*C-F=2.8 Hz), 123.0 (t, *J*C-F=242.1 Hz), 125.5 (t, *J*C-F=6.0 Hz), 126.8, 127.3, 128.2 (d, *J*C-F=14.6 Hz), 128.5, 128.7 (d, *J*C-F=2.6 Hz), 130.9 (d, *J*C-F=3.8 Hz), 132.4, 136.9 (t, *J*C-F=27.0 Hz), 140.7, 140.8 (d, *J*C-F=4.5 Hz), 142.7, 160.0 (d, *J*C-F=248.0 Hz); 19F NMR (282 MHz) ** -118.0 (ddt, *J*=11.5, 8.5, 1.5 Hz, 1F), -95.7 (t, *J*=16.5 Hz, 2F); Anal. Calcd for C36H47F3: C, 80.56; H, 8.83; found C, 80.62; H, 8.67.

**4-Dodecyloxy-4''-pentyl-1,1':4',1''-terphenyl** (**36**)

Compound **36** was prepared as described for the preparation of compound **11** except that the reaction mixture was heated under reflux for 3 h using the quantities stated: bromobiphenyl **40** (0.806 g, 2.66 mmol), tetrakis(triphenylphosphine)palladium(0) (0.170 g, 0.147 mmol), sodium carbonate (3.0 mL, 2.0M, 6.0 mmol), benzene (6.0 mL), phenylboronic acid **10** (1.02 g, 3.33 mmol) and ethanol (3.0 mL). After passing the crude extracts through a silica plug (8 cm long x 4 cm diameter) the material was subjected to gradient column chromatography on silica gel (hexanes, dichloromethane) and crystallized from methanol – pentane (1:1, 100 mL) to afford a white solid which was dried under reduced pressure (P2O5, paraffin wax, 36 h, 1.1 mm Hg) to afford the title compound **36** as a white solid (0.680 g, 53%). Transitions (ºC) Cryst 105.6 G 186.5 SB 202.6 SA 206.9 Iso Liq; 1H NMR  0.88 (t, *J*=6.7 Hz, 3H), 1.00 (t, *J*=7.3 Hz, 3H), 1.24-1.40 (m, 20H), 1.55 (quint, *J*=7.8 Hz, 2H), 1.66 (quint, *J*=7.8 Hz, 2H), 1.80 (quint, *J*=7.2 Hz, 2H), 2.65 (t, *J*=7.7 Hz, 2H), 4.02 (t, *J*=6.5 Hz, 2H), 6.98 (d, *J*=8.8 Hz, 2H), 7.26 (d, *J*=8.1 Hz, 2H), 7.55 (d, *J*=8.1 Hz, 2H), 7.56 (d, *J*=8.8 Hz, 2H), 7.61 (d, *J*=8.8 Hz, 2H), 7.65 (d, *J*=8.3 Hz, 2H); 13C NMR ** 14.2, 14.3, 22.7, 22.9, 26.2, 29.5 (2), 29.6, 29.8, 31.4, 31.7, 32.1, 35.8, 68.3, 115.0, 127.0, 127.1, 127.4, 128.1, 129.0, 133.2, 138.3, 139.6 (2), 142.3, 158.9; Anal. Calcd for C35H48O: C, 86.72; H, 9.98; found C, 86.62; H, 9.83.

**4-Dodecyloxy-2'-fluoro-4''-pentyl-1,1':4',1''-terphenyl** (**37**)

Compound **37** was prepared as described for the preparation of compound **11** except that the reaction mixture was heated under reflux for 3 h using the quantities stated: bromobenzene **22** (0.156 g, 0.687 mmol), tetrakis(triphenylphosphine)palladium(0) (0.027 g, 0.023 mmol), sodium carbonate (0.7 mL, 2.0M, 1.4 mmol), benzene (1.5 mL), biphenylboronic acid **12** (0.350 g, 0.875 mmol) and ethanol (0.7 mL). The crude product was purified by column chromatography on silica gel (pentane-dichloromethane 20:1) and dried under reduced pressure (P2O5, paraffin wax, 36 h, 1.1 mm Hg) to afford the title compound **37** as a white solid (0.330 g, 96%). Transitions (ºC) Cryst 60.7 SB 65.6 SC 95.7 SA 131.0 N 139.1 Iso Liq; 1H NMR (500 MHz)  0.91 (t, *J*=6.3 Hz, 3H), 0.94 (t, *J*=7.1 Hz, 3H), 1.24-1.45 (m, 20H), 1.50 (quint, *J*=7.3 Hz, 2H), 1.69 (quint, *J*=7.5 Hz, 2H), 1.83 (quint, *J*=7.1 Hz, 2H), 2.67 (t, *J*=7.9 Hz, 2H), 4.02 (t, *J*=6.3 Hz, 2H), 7.00 (d, *J*=8.7 Hz, 2H), 7.29 (d, *J*=7.9 Hz, 2H), 7.37-7.51 (m, 3H), 7.55 (d, *J*=8.7 Hz, 2H), 7.55 (d, *J*=7.9 Hz, 2H); 13C NMR (125 MHz) ** 14.1, 14.2, 22.7, 22.8, 26.2, 29.4, 29.5(2), 29.7, 29.8, 31.2, 31.6, 32.0, 35.7, 68.2, 114.4 (d, *J*C-F=23.9 Hz), 114.6, 122.7 (d, *J*C-F=3.6 Hz), 126.8, 127.1 (d, *J*C-F=18.6 Hz), 127.8, 130.1, 130.7 (d, *J*C-F=3.6 Hz), 137.0, 141.7 (d, *J*C-F=7.3 Hz), 142.8, 158.9, 160.1 (d, *J*C-F=247.4 Hz); 19F NMR ** -118.6 (dd, *J*F-H =12.0 Hz, 8.0 Hz); Anal. Calcd for C35H47FO: C, 83.62; H, 9.42; found C, 83.73; H, 9.24.

**4-Butoxy-4''-dodecyloxy-1,1':4',1''-terphenyl** (**38**)

Compound **38** was prepared as described for the preparation of compound **11** except that the reaction mixture was heated under reflux for 3 h using the quantities stated: bromobenzene **23** (0.156 g, 0.680 mmol), tetrakis(triphenylphosphine)palladium(0) (0.031 g, 0.027 mmol), sodium carbonate (0.7 mL, 2.0M, 1.4 mmol), benzene (2.5 mL), biphenylboronic acid **7** (0.382 g, 1.00 mmol) and ethanol (1.7 mL). The crude product was crystallized from methanol and dried under reduced pressure (P2O5, paraffin wax, 48 h, 0.1 mm Hg) to afford a white solid (0.250 g, 76%). Transitions (ºC) Cryst 120.0 SX 187.2 SE 228.2 SA 235.0 Iso Liq; 1H NMR ** 0.88 (t, *J*=6.7 Hz, 3H), 0.99 (t, *J*=7.4 Hz, 3H), 1.24-1.40 (m, 16H), 1.42-1.58 (m, 4H), 1.75-1.85 (m, 4H), 4.00 (t, *J*=6.5 Hz, 2H), 4.01 (t, *J*=6.5 Hz, 2H), 6.98 (d, *J*=8.6 Hz, 4H), 7.55 (d, *J*=8.7 Hz, 4H), 7.60 (s, 4H); 13C NMR ** 14.0, 14.3, 19.4, 22.9, 26.2, 29.5(2), 29.6, 29.8, 31.5, 32.1, 67.9, 68.3, 115.0, 127.1, 128.1, 133.2, 139.3, 158.9; Anal. Calcd for C34H46O2: C, 83.90; H, 9.53; found C, 83.50; H, 9.70.

**4''-Butoxy-4-dodecyloxy-2'-fluoro-1,1':4',1''-terphenyl** (**39**)

Compound **39** was prepared as described for the preparation of compound **11** except that the reaction mixture was heated under reflux for 3 h using the quantities stated: bromobenzene **23** (0.156 g, 0.680 mmol), tetrakis(triphenylphosphine)palladium(0) (0.025 g, 0.022 mmol), sodium carbonate (0.7 mL, 2.0M, 1.4 mmol), benzene (1.5 mL), biphenylboronic acid **12** (0.334 g, 0.835 mmol) and ethanol (0.7 mL). Concentration of the crude product *in vacuo* gave a yellowish solid, which was subjected to column chromatography on silica gel (petroleum ether –dichloromethane 20:1, then petroleum ether – dichloromethane 10:1). The product was dried under vacuum (P2O5, paraffin wax, 0.1 mm Hg) to afford the title compound **39** as a white solid (0.33 g, 96%). Transitions (ºC) Cryst 104.7 (SX 97.1) SC 137.6 SA 162.4 N 170.7 Iso Liq; 1H NMR  0.88 (t, *J*=6.7 Hz, 3H), 0.99 (t, *J*=7.4 Hz, 3H), 1.20-1.41 (m, 16H), 1.45-1.55 (m, 4H), 1.75-1.86 (m, 4H), 4.01 (t, *J*=6.6 Hz, 2H), 4.02 (t, *J*=6.5 Hz, 2H), 6.98 (d, *J*=8.8 Hz, 4H), 7.30-7.48 (m, 3H), 7.49-7.70 (m, 4H); 13C NMR ** 14.0, 14.3, 19.4, 22.9, 26.2, 29.4, 29.5, 29.6, 29.8, 31.5, 32.1, 68.0, 68.2, 114.1 (d, *J*C-F=23.5 Hz), 114.7, 115.0, 122.5 (d, *J*C-F=3.2 Hz), 126.9 (d, *J*C-F=13.4 Hz), 127.9, 128.1, 130.1 (d, *J*C-F=2.9 Hz), 130.7 (d, *J*C-F=3.8 Hz), 132.0, 141.5 (d, *J*C-F=8.3 Hz), 158.9, 159.3, 160.1 (d, *J*C-F=246.7 Hz); 19F NMR ** -118.7 (dd, *J*F-H = 11.0 Hz, 8.0 Hz); Anal. Calcd for C34H45FO2: C, 80.91; H, 8.99; Found: C, 80.55; H, 8.95.

**2-Butoxy-5-(4’-dodecyloxybiphenyl-4-yl)thiophene** (**45**)

Compound **45** was prepared as described for the preparation of compound **11** except that the reaction mixture was heated under reflux for 3 h using the quantities stated: bromobenzene **44** (0.234 g, 0.752 mmol), tetrakis(triphenylphosphine)palladium(0) (0.043 g, 0.037 mmol), sodium carbonate (1.5 mL, 2.0M, 3.0 mmol), benzene (2.5 mL), phenylboronic acid **10** (0.288 g, 0.941 mmol) and ethanol (1.3 mL). The residue was passed through a short silica plug (6 cm long, 4 cm in diameter). Concentration *in vacuo* gave a crude yellowish solid, which was subjected to column chromatography on silica gel (petroleum ether –dichloromethane 20:1, then petroleum ether – dichloromethane 10:1). The product was crystallized from pentane - chloroform (5:1) and dried under vacuum (P2O5, paraffin wax, 0.1 mm Hg) to afford the title compound **45** as a white solid (0.36 g, 97%). Transitions (ºC) Cryst 92.2 G 148.8 SC 166.3 SA 181.4 Iso Liq; 1H NMR ** 0.89 (t, *J=*6.6 Hz, 3H), 0.99 (t, *J*=7.4 Hz, 3H), 1.20-1.40 (m, 16H), 1.40-1.55 (m, 4H), 1.77-1.85 (m, 4H), 4.00 (t, *J=*6.5 Hz, 2H), 4.08 (t, *J=*6.5 Hz, 2H), 6.19 (d, *J=*3.9 Hz, 1H), 6.93 (d, *J*=3.9 Hz, 1H), 6.97 (d, *J*=8.7 Hz, 2H), 7.52 (s, 4H), 7.52 (d, *J=*8.5 Hz, 2H); 13C NMR ** 13.9, 14.3, 19.3, 22.9, 26.2, 29.5 (2), 29.6, 29.8, 31.4, 32.1, 68.3, 73.7, 105.9, 115.0, 120.6, 125.3, 127.1, 127.9, 130.1, 133.1, 133.3, 139.1, 158.9, 165.3; Anal. Calcd for C32H44O2S: C, 78.00; H, 9.00; S, 6.51; found C, 78.04; H, 8.71; S, 6.78.

**2-Butoxy-5-(4’-dodecyloxy-2-fluorobiphenyl-4-yl)thiophene** (**49**)

Compound **49** was prepared as described for the preparation of compound **11** except that the reaction mixture was heated under reflux for 7 h using the quantities stated: bromothiophene **48** (0.118 g, 0.502 mmol), tetrakis(triphenylphosphine)palladium(0) (0.018 g, 0.016 mmol), sodium carbonate (0.5 mL, 2.0M, 1.0 mmol), benzene (1.0 mL), biphenylboronic acid **12** (0.308 g, 0.769 mmol) and ethanol (0.6 mL). The residue was passed through a silica plug (7 cm long, 6cm in diameter) using vacuum suction. The silica plug was quickly washed with petroleum ether-dichloromethane (1:1) (200 mL). The organic solution was concentrated *in vacuo* and the residue was crystallized from methanol (150 mL) to afford a white solid (0.181 g, 71%). An analytically pure sample was obtained upon further column chromatography (petroleum ether - dichloromethane 3:1) and crystallization from methanol followed by drying under reduced pressure (P2O5, paraffin wax, 1.1 mm Hg). Transitions (ºC) Cryst 64.8 SC 80.1 N 126.4 Iso Liq; 1H NMR ** 0.88 (t, *J*=6.9 Hz, 3H), 0.98 (t, *J*=7.2 Hz, 3H), 1.23-1.40 (m, 16H), 1.48 (m, 4H), 1.79 (m, 4H), 4.00 (t, *J*= Hz, 2H), 4.08 (t, *J*= Hz, 2H), 6.19 (d, *J*= 4.0 Hz, 2H), 6.96 (d, *J*= 8.7 Hz, 2H), 6.98 (d, *J*=4.0, 1H), 7.24 (dd, *J*H-F=15.6 Hz, *J*=1.8 Hz, 1H), 7.29 (d, *J*=1.8 Hz, 1H), 7.36 (app. t, *J*=8.1 Hz, 1H), 7.48 (dd, *J*=8.7, 1.5 Hz, 2H); 13C NMR ** 13.9, 14.2, 19.2, 22.8, 26.2, 29.4, 29.5 (2), 29.7, 31.3, 32.1, 68.3, 73.8, 106.0, 112.3 (d, *J*C-F=24.9 Hz), 114.7, 120.7 (d, *J*C-F=2.9 Hz), 121.4, 126.8 (d, *J*C-F=13.4 Hz), 127.8, 128.7 (d, *J*C-F=2.0 Hz), 130.0 (d, *J*C-F=2.9 Hz), 130.7 (d, *J*C-F=4.3 Hz), 135.5 (d, *J*C-F=8.6 Hz), 159.0, 160.1 (d, *J*C-F=247.0 Hz), 165.9; 19F NMR ** -118.5 (ddt, *J*F-H = 12.2 Hz, 8.3 Hz, 1.6 Hz, 1F); Anal. Calcd for C32H43FO2S: C, 75.25; H, 8.49; found C, 75.06; H, 8.36
